# Supplementary material for: Identification of ABC Transporter Genes of Fusarium graminearum with Roles in Azole Tolerance and/or Virulence
Source: PLOS journal article supplement (doi:10.1371/journal.pone.0079042), 2013-11-11
Supplement: S1 (10.1371/journal.pone.0079042.s001) [file journal.pone.0079042.s001]

## Supplemental Fig. 1

wild type locus

gene: ***FgABC1***

annotation: FGSG\_10995

FGDB: related to multidrug resistance protein

ORF: 4632 bp

protein: 1472 aa

deletion construct

left flank: 1190 bp

*hph* cassette: 2095 bp

right flank: 1205 bp

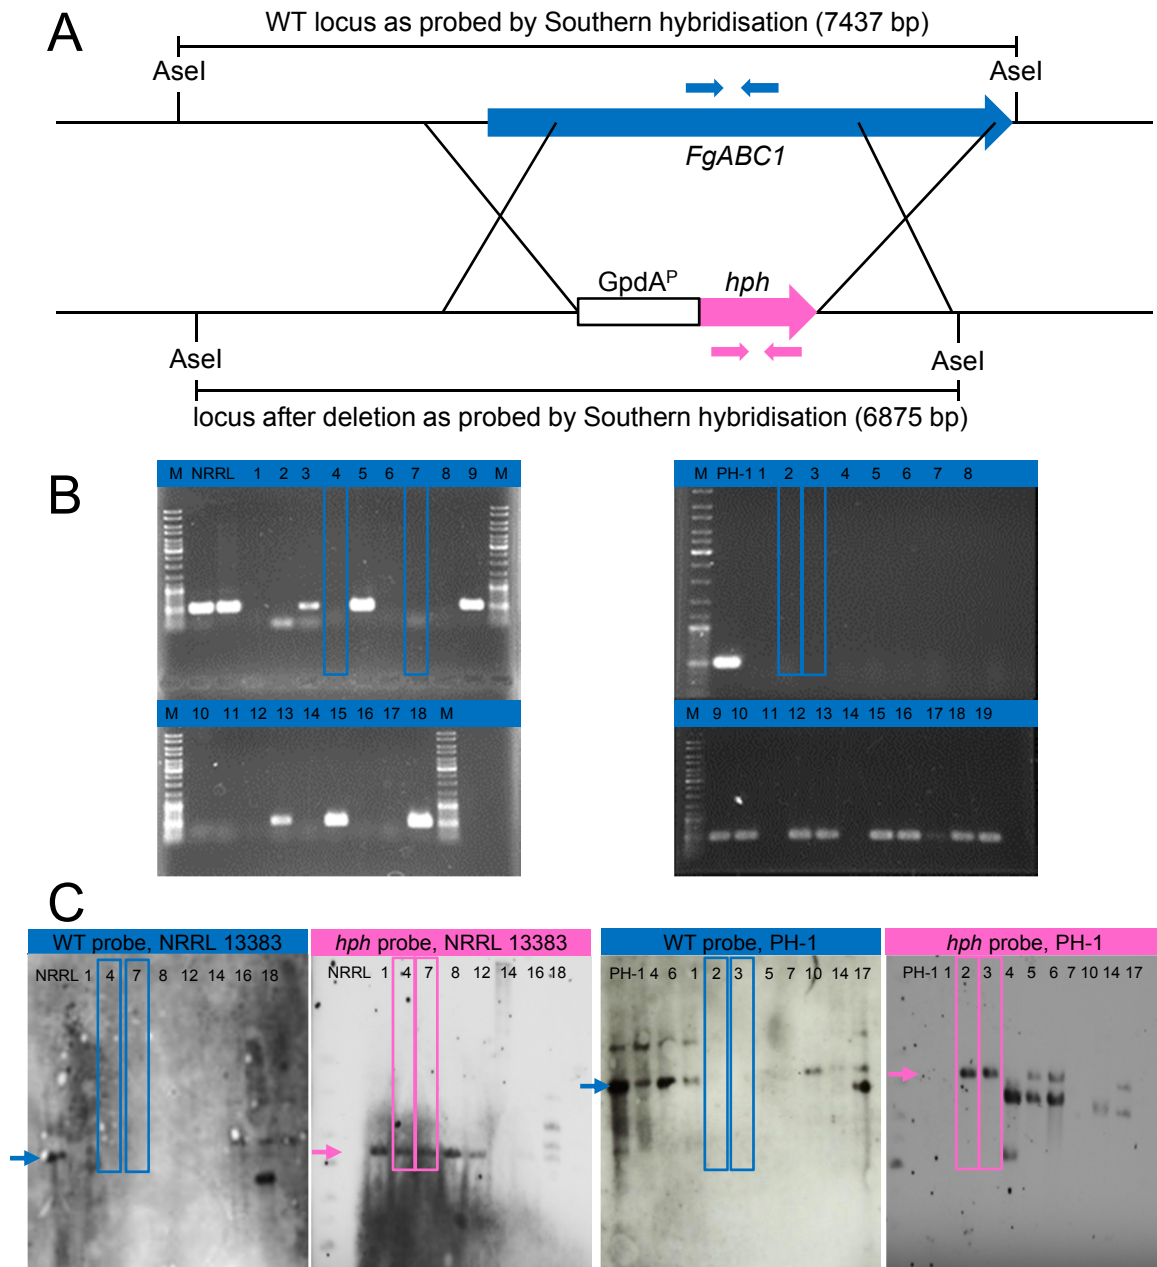

A) Strategy to delete *FgABC1*. Blue arrows give the positions of primers used to detect the wild type locus by PCR. Pink arrows indicate the respective primers for the hygromycin resistance marker (*hph*). The same primers were used to generate DIG-labelled probes used for Southern hybridisation. B) Results of PCR targeting the wild type locus. C) Results of Southern hybridisation detecting the wild type locus (blue) and *hph* (pink). Arrows indicate the expected band. Boxed lanes indicate clones used for subsequent analyses.

wild type locus

gene: ***FgABC2***

annotation: FGSG\_17046 (formerly FGSG\_08373)

FGDB: related to ABC transporter

ORF: 4836 bp

protein: 1611 aa

deletion construct

left flank: 1217 bp

*nat1* cassette: 1473 bp

right flank: 1143 bp

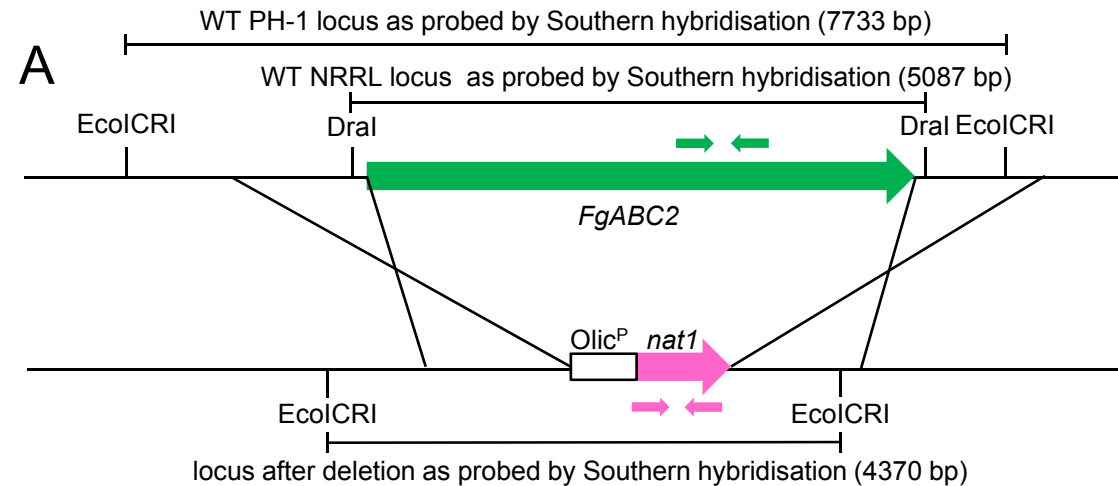

**B**

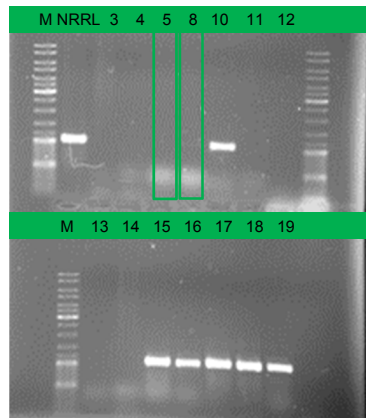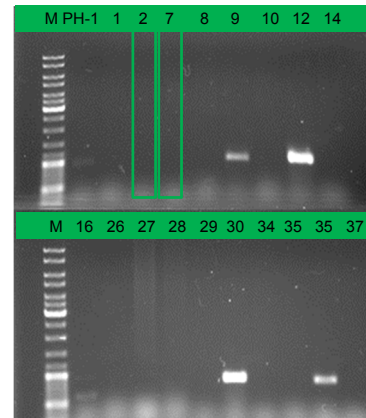

**C**

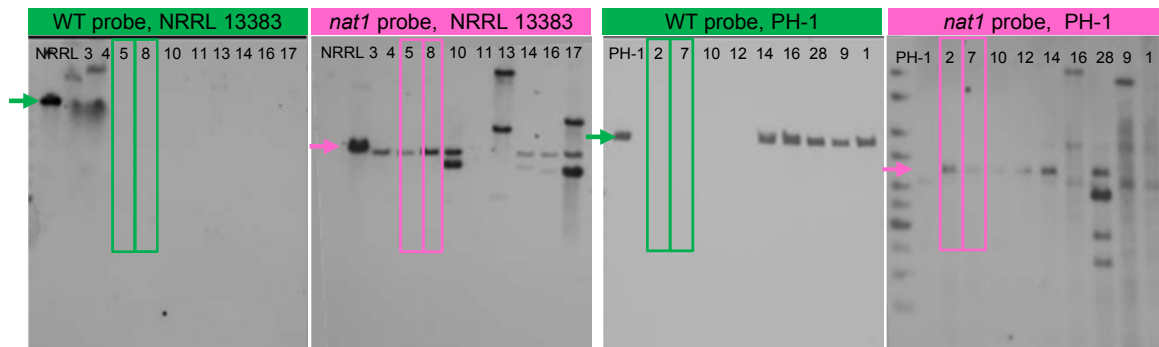

A) Strategy to delete *FgABC2*. Green arrows give the positions of primers used to detect the wild type locus by PCR. Pink arrows indicate the respective primers for the nourseothricin resistance marker (*nat1*). The same primers were used to generate the DIG-labelled probes used for Southern hybridisation. B) Results of PCR targeting the wild type locus. C) Results of Southern hybridisation detecting the wild type locus (green) and *nat1* (pink). Arrows indicate the expected band. Boxed lanes indicate clones used for subsequent analyses.

wild type locus  
 gene: ***FgABC3***  
 annotation: FGSG\_04580  
 FGDB: probable ABC1 transport protein  
 ORF: 4575 bp  
 protein: 1489 aa

deletion construct  
 left flank: 896 bp  
*npt* cassette: 1251 bp  
 right flank: 571 bp

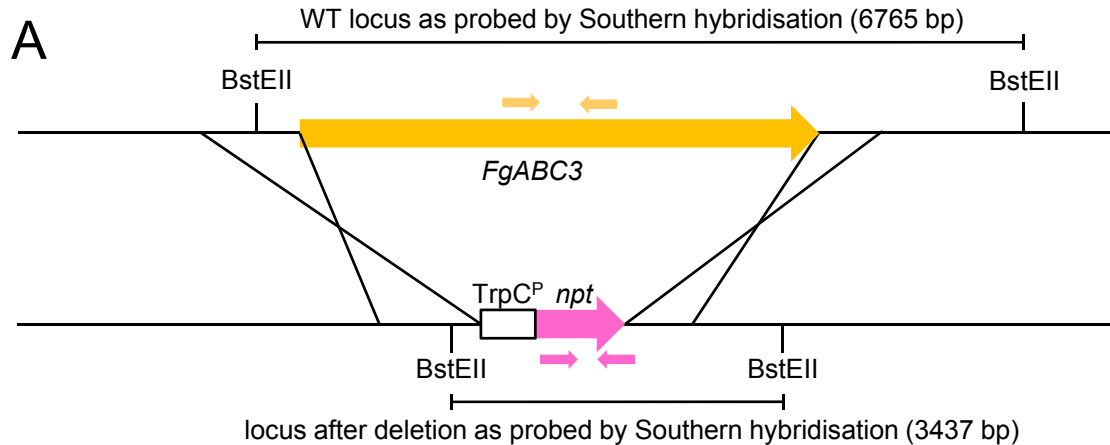

**B**

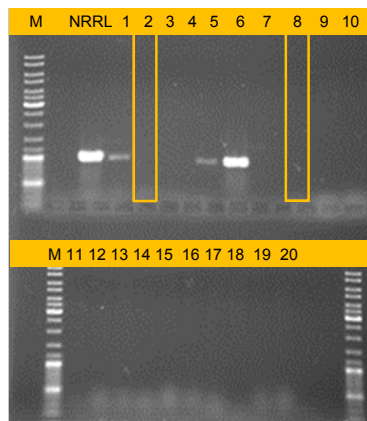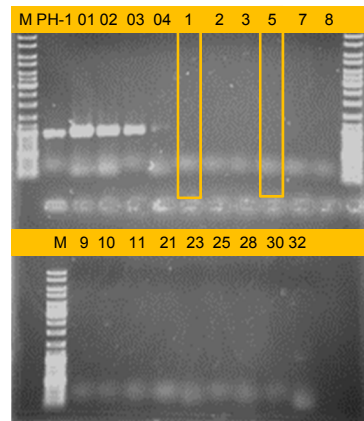

**C**

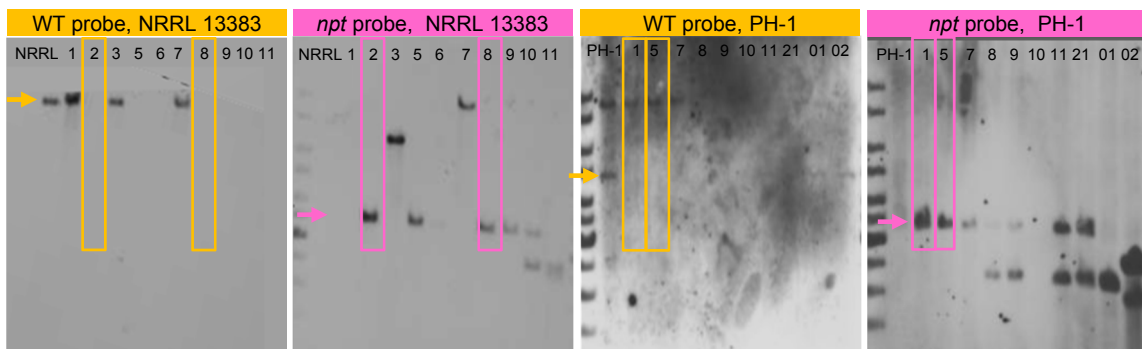

A) Strategy to delete *FgABC3*. Orange arrows give the positions of primers used to detect the wild type locus by PCR. Pink arrows indicate the respective primers for the neomycin resistance marker (*npt*). The same primers were used to generate the DIG-labelled probes used for Southern hybridisation. B) Results of PCR targeting the wild type locus. C) Results of Southern hybridisation detecting the wild type locus (orange) and *npt* (pink). Arrows indicate the expected band. Boxed lanes indicate clones used for subsequent analyses.

wild type locus  
 gene: ***FgABC4***  
 annotation: FGSG\_17058 (formerly FGSG\_08308)  
 FGDB: related to multidrug resistance protein  
 ORF: 4562 bp  
 protein: 1449 aa

deletion construct  
 left flank: 1026 bp  
*nat1* cassette: 1473 bp  
 right flank: 1070 bp

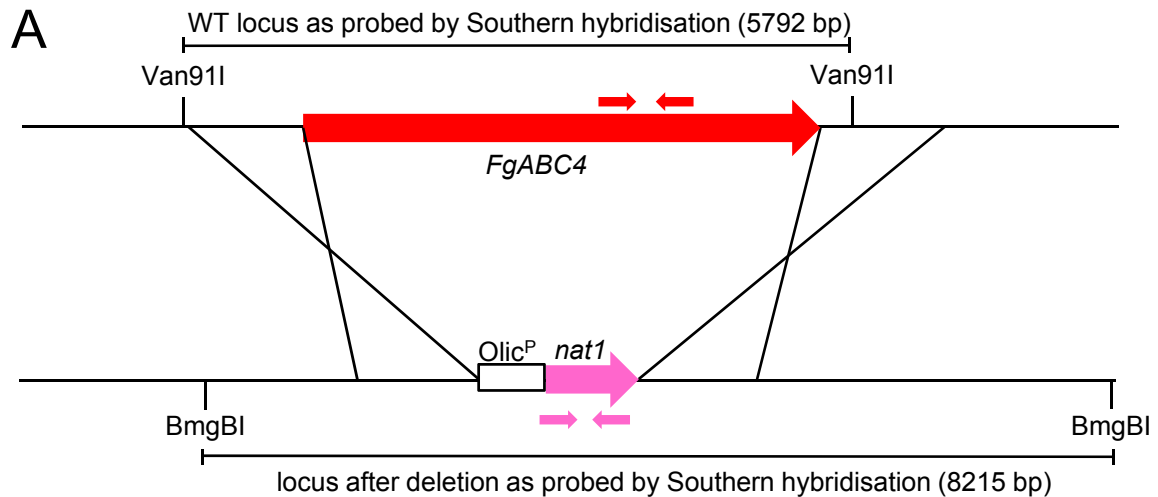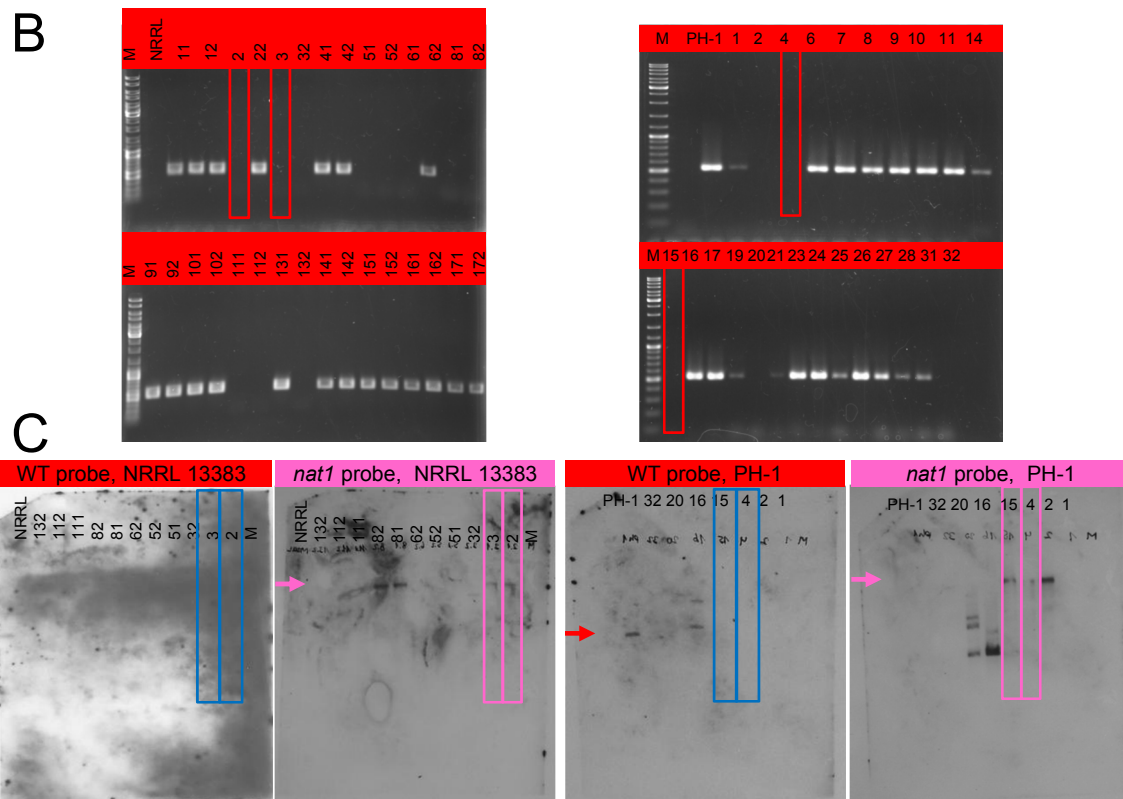

A) Strategy to delete *FgABC4*. Red arrows give the positions of primers used to detect the wild type locus by PCR. Pink arrows indicate the respective primers for the nourseothricin resistance marker (*nat1*). The same primers were used to generate the DIG-labelled probe used for Southern hybridisation. B) Results of PCR targeting the wild type locus. C) Results of Southern hybridisation detecting the wild type locus (red) and *nat1* (pink). Arrows indicate expected band. Boxed lanes indicate clones used for subsequent analyses.
